# Supplementary material for: Involvement of c-Myc in low dose radiation-induced senescence enhanced migration and invasion of unirradiated cancer cells
Source: Aging (Albany NY). 2021 Sep 22;13(18):22208–31. doi: 10.18632/aging.203527 (PMC8507273; doi:10.18632/aging.203527)
Supplement: Supplementary Figures [file aging-13-203527-s001.pdf]

## SUPPLEMENTARY FIGURES

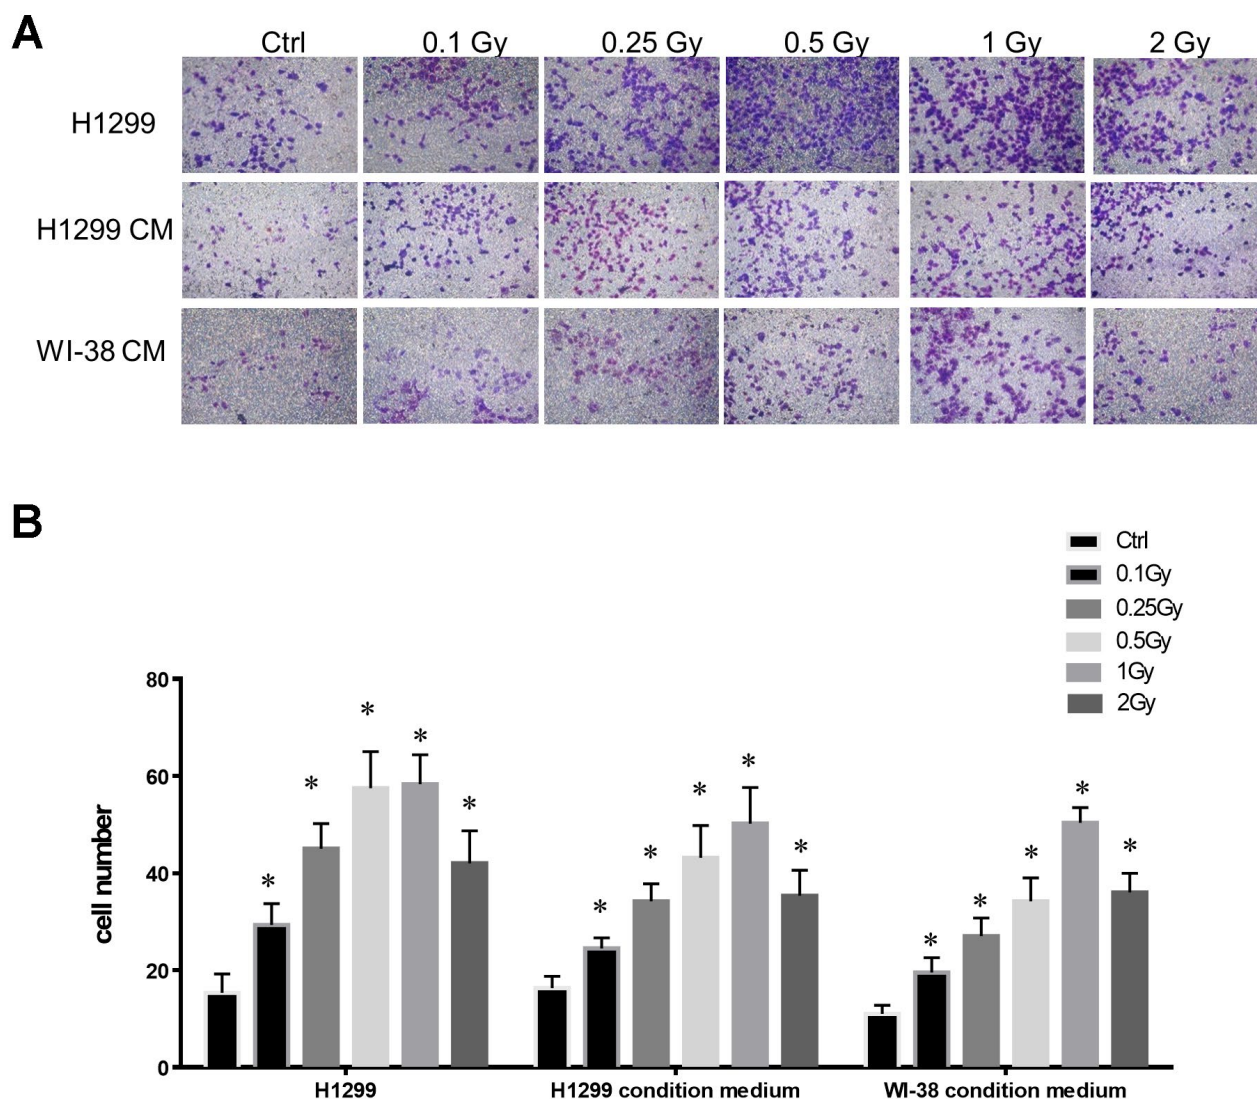

**Supplementary Figure 1. *In vitro* invasion assay.** (A) H1299 cells were either irradiated by different doses of X-rays, or treated with conditioned medium (CM) of irradiated H1299 cells or irradiated WI-38 cells. (B) Quantification of the number of cells transverse matrigel coated transwells at different conditions. \* $p < 0.05$  compared to ctrl.

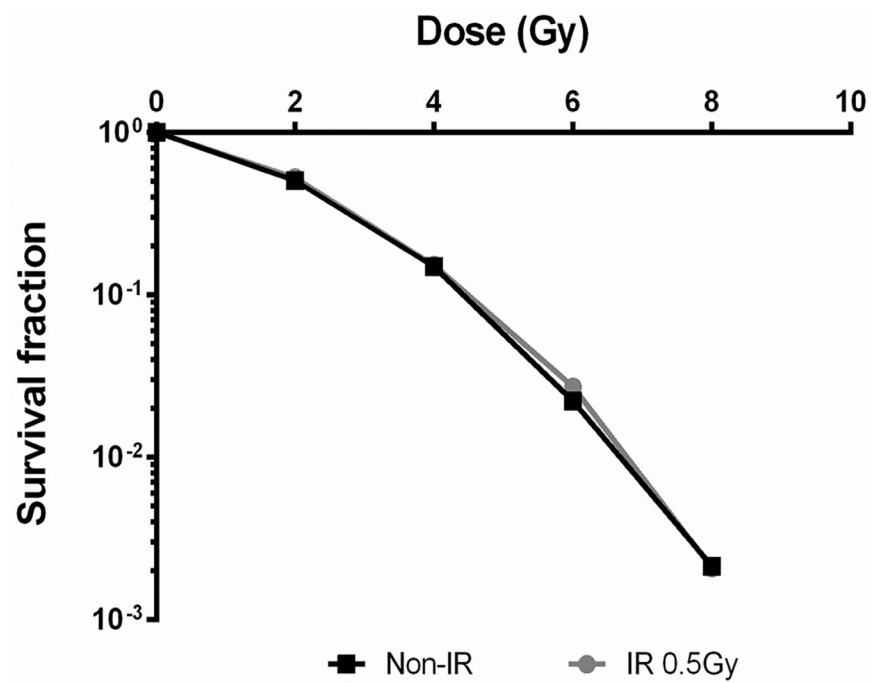

Supplementary Figure 2. Colony formation assay for analysis of survival fractions of LDR (0.5Gy) pretreated H1299 cells or untreated cells exposed to 2 to 8 Gy of X-rays.

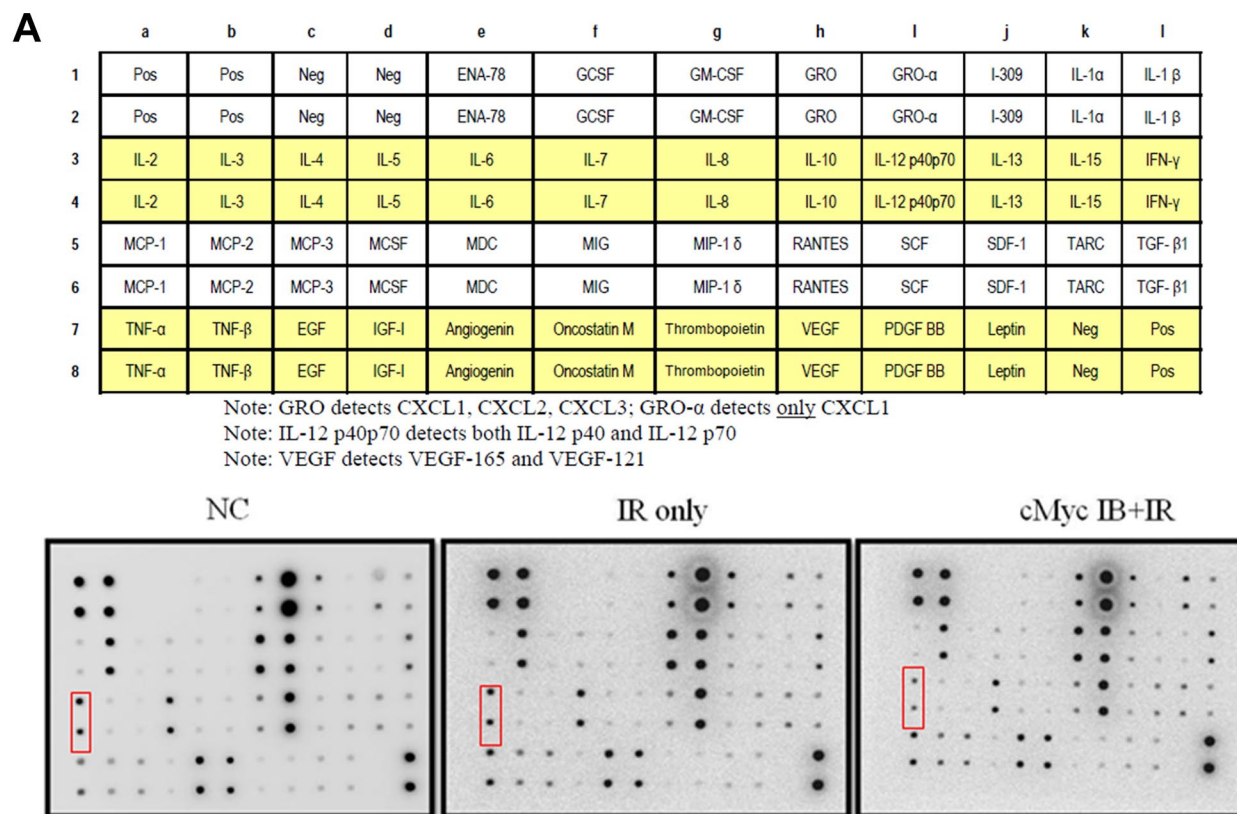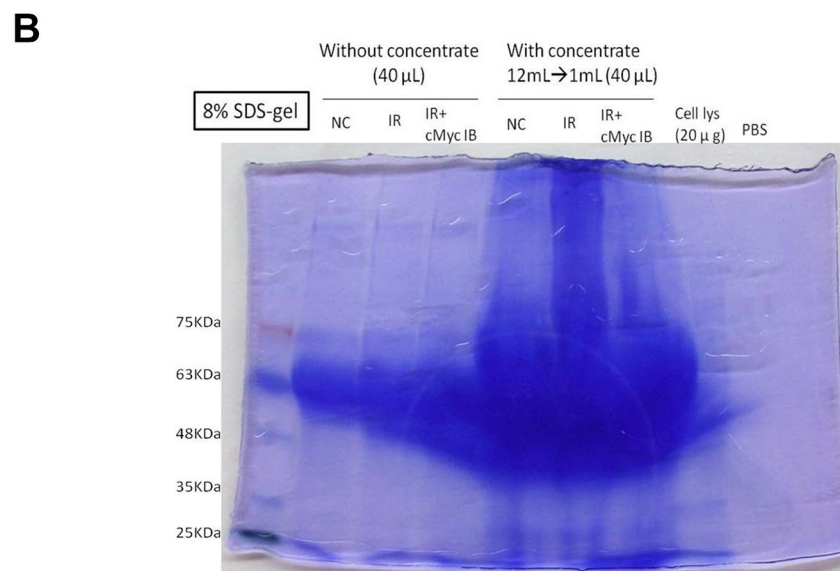

**Supplementary Figure 3. Cytokine array analysis of irradiated CM.** (A) Cytokine array was used to detect the cytokines released in CM (0.5Gy irradiated) with or without c-Myc inhibitor (Myc IB, 50  $\mu$ m) treatment. (B) SDS-PAGE with Coomassie blue staining of ICM with or without spin concentration.

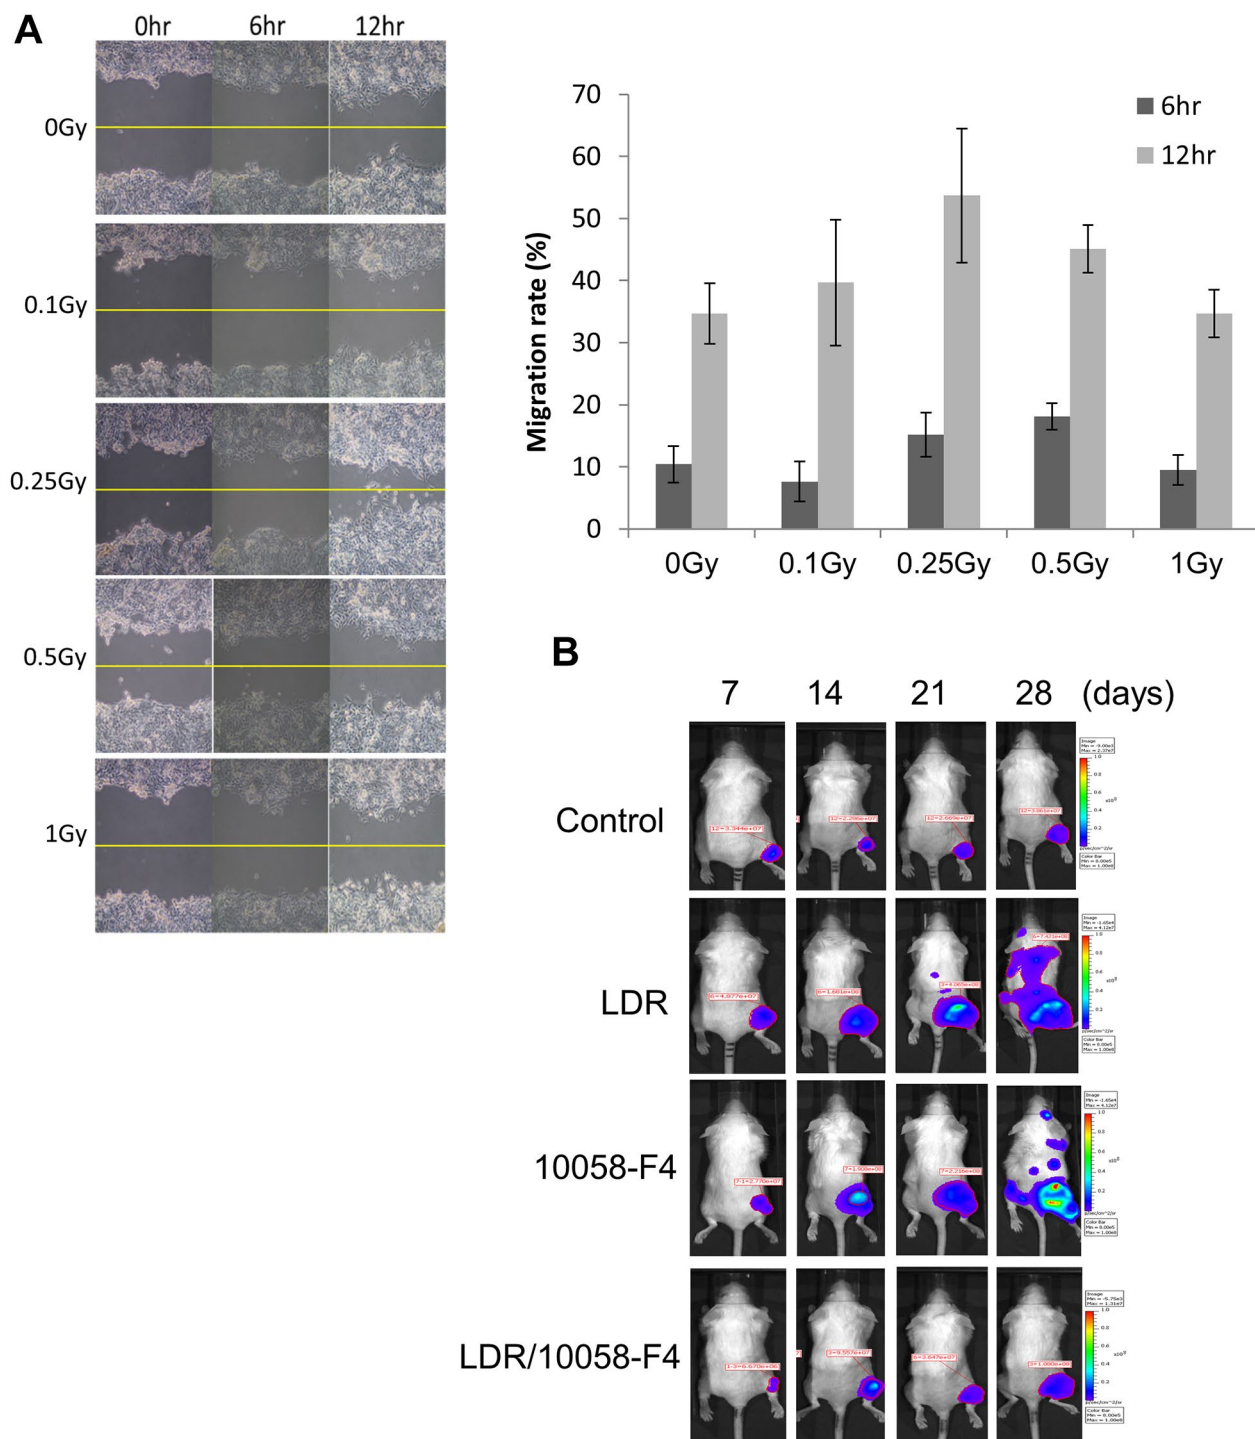

**Supplementary Figure 4. Effects of LDR on 4T1-3R murine breast cancer generated syngeneic tumor model. (A)** Wound healing assay for analysis of 4T1-3R cell migration after exposure to LDR. **(B)** Time course dependent *in vivo* bioluminescent imaging for detecting the tumor metastasis after LDR and/or 10058-F4 (25 mg/kg) treatment in the syngeneic tumor model.

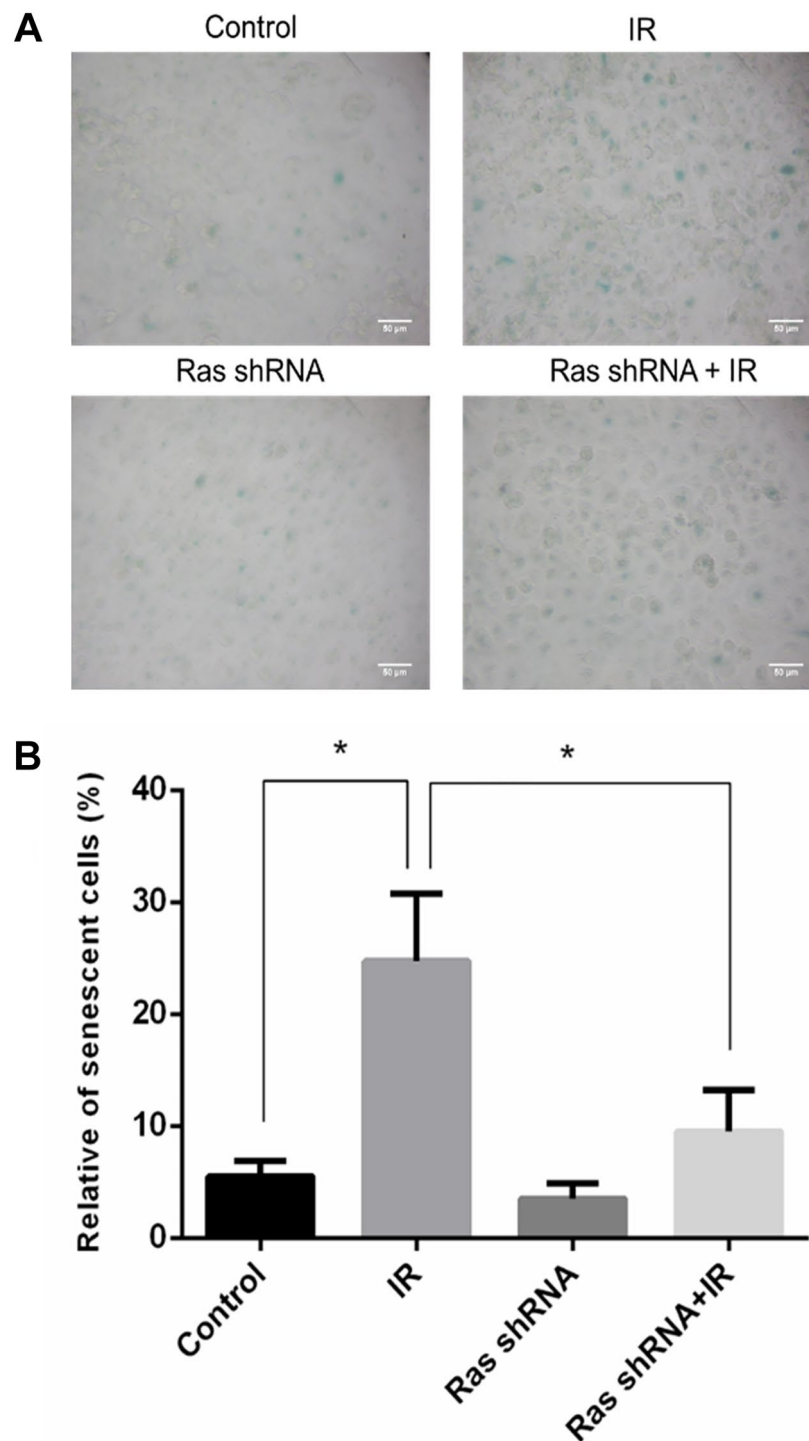

**Supplementary Figure 5. Knockdown of K-Ras suppressed LDR induced cell senescence. (A)** SA- $\beta$ -gal staining in H1299 cells treated with Ras shRNA and/or 0.5Gy of X-rays. **(B)** Quantification of SA- $\beta$ -gal staining. \* $p < 0.05$ .
